# Supplementary material for: Autophagy dysfunction contributes to NLRP1 inflammasome-linked depressive-like behaviors in mice
Source: Springer Nature journal article supplement (doi:10.1186/s12974-023-02995-4), 2024-01-04
Supplement: MOESM1 [file 12974_2023_2995_MOESM1_ESM.pdf]

**Figure S1**

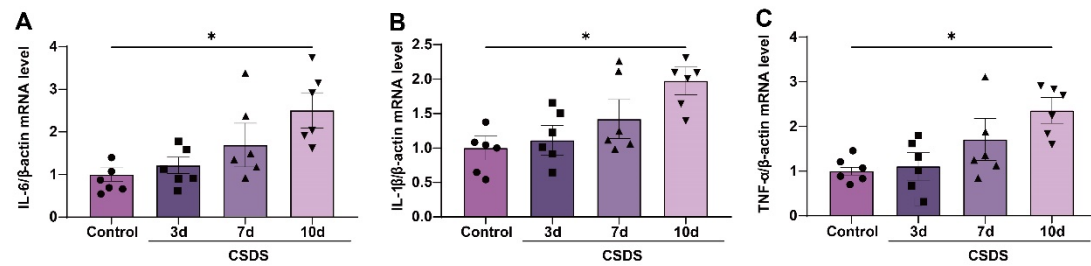

**Fig. S1 Effects of different time courses of CSDS on the mRNA levels of proinflammatory cytokines in mice.** Statistical results show that CSDS increased the mRNA levels of hippocampal IL-6 (A), IL-1 $\beta$ (B) and TNF- $\alpha$  (C) in a time-dependent manner. Data represented the mean  $\pm$  SEM. n = 6, \* $p$  < 0.05 vs control group.
